# Supplementary material
Source: PubMed Central journal article supplement (PMC4164049)

passages had no significant differences. Data presented as mean  $\pm$  SD from three independent experiments. (B) Fluorescence micrographs of colonies of hESCs cultured on grafted PMEDSAH and ATRP PMEDSAH showing expression of pluripotent markers after 5 passages. Primary antibodies OCT4 and SSEA-4 were used to detect the expression of these markers from hESCs cultured on grafted PMEDSAH and ATRP PMEDSAH (25nm, 105nm and 176nm). hESC cultured on 105nm ATRP PMEDSAH after 5 passages (C) showed expression of pluripotent markers in fluorescence micrographs and (D) kept a normal karyotype.

**Fig. 4.** Modified PMEDSAH supports hESC pluripotency. hESCs cultured on 105nm ATRP PMEDSAH after 5 passages retained pluripotency as demonstrated by induced specific lineage differentiation with expression of genes representing different germ layers. Data presented in as mean  $\pm$  SD from three independent experiments .

**Table 1** Calculated total cell number of hESCs cultured on different substrates

**Table 2** EB formation with expression of genes representing different germ layers. EBs were formed from hESCs cultured on 105nm ATRP PMEDSAH after 5 passages. Quantitative RT-PCR showed increasing transcript levels of genes representing different germ layers from EBs compared to the undifferentiated hESCs grown on 105 nm ATRP PMEDSAH after 5 passages.

**Supplementary Fig. 1.** Gel architecture influences the undifferentiated colony formation of hESCs (H9 cells). Plot of undifferentiated colony number ratio compared to Matrigel indicated ATRP PMEDSAH with a 105nm hydrogel thickness led to a higher number of undifferentiated colonies compared to other experimental groups. Plot of undifferentiated colony area indicated no significant differences among cells cultured on different polymer

substrates. Data presented as mean  $\pm$  SD from three independent experiments (\* $p$ <0.05).

**Supplementary Fig. 2.** Expression of SSEA-4 in hESCs cultured on different substrates after multiple passages.

hESCs cultured on different substrates from week 1 to week 5 were analyzed by flow cytometry to determine the percentage of SSEA-4 expressing cells. Background fluorescence and autofluorescence were determined using cells without treatment (- Control) and treated with Mouse IgG1 Phycoerythrin Isotype Control (PE). Because cells grown on Matrigel decreased after each passage, the amount of cells was not enough for flow cytometry from week

3.

| Substrates           | Calculated total cell numbers from Week 0 to Week 5 |                     |                     |                     |                     |                     |
|----------------------|-----------------------------------------------------|---------------------|---------------------|---------------------|---------------------|---------------------|
|                      | W0                                                  | W1                  | W2                  | W3                  | W4                  | W5                  |
| Matrigel             | 2x10 <sup>4</sup>                                   | 3.7x10 <sup>5</sup> | 2.4x10 <sup>6</sup> | 3.5x10 <sup>6</sup> | 1.2x10 <sup>6</sup> | /                   |
| Grafted PMEDSAH      | 2x10 <sup>4</sup>                                   | 1.4x10 <sup>5</sup> | 8.2x10 <sup>5</sup> | 5.0x10 <sup>6</sup> | 2.7x10 <sup>7</sup> | 1.4x10 <sup>8</sup> |
| ATRP PMEDSAH (25nm)  | 2x10 <sup>4</sup>                                   | 2.5x10 <sup>5</sup> | 2.4x10 <sup>6</sup> | 3.4x10 <sup>7</sup> | 2.9x10 <sup>8</sup> | 2.9x10 <sup>9</sup> |
| ATRP PMEDSAH (105nm) | 2x10 <sup>4</sup>                                   | 3.2x10 <sup>5</sup> | 4.0x10 <sup>6</sup> | 4.9x10 <sup>7</sup> | 4.0x10 <sup>8</sup> | 4.7x10 <sup>9</sup> |
| ATRP PMEDSAH (176nm) | 2x10 <sup>4</sup>                                   | 1.7x10 <sup>5</sup> | 1.4x10 <sup>6</sup> | 1.0x10 <sup>7</sup> | 6.2x10 <sup>7</sup> | 3.7x10 <sup>8</sup> |

Formula:  $CN_{(n+1)} = CN_n \times TN_{(n+1)} / 20000$

CN: Calculated total cell number, TN: total cell number, n: culture week number

|                 | <b>Gene</b>    | <b>Relative Transcript Levels <math>\pm</math> SD</b> |
|-----------------|----------------|-------------------------------------------------------|
| <b>Endoderm</b> | <i>PDX1</i>    | 35.58 $\pm$ 2.58                                      |
|                 | <i>AFP</i>     | 53.14 $\pm$ 4.76                                      |
|                 | <i>SOX17</i>   | 159.47 $\pm$ 12.51                                    |
|                 | <i>FOXA2</i>   | 249.12 $\pm$ 25.67                                    |
| <b>Mesoderm</b> | <i>HESX1</i>   | 10.21 $\pm$ 0.84                                      |
|                 | <i>TNN13</i>   | 94.32 $\pm$ 6.99                                      |
|                 | <i>NKX2-5</i>  | 117.31 $\pm$ 4.04                                     |
| <b>Ectoderm</b> | <i>NES</i>     | 3.58 $\pm$ 0.15                                       |
|                 | <i>SOX1</i>    | 37.26 $\pm$ 1.35                                      |
|                 | <i>PAX6</i>    | 107.36 $\pm$ 7.27                                     |
|                 | <i>NEUROD1</i> | 860.77 $\pm$ 97.08                                    |

A

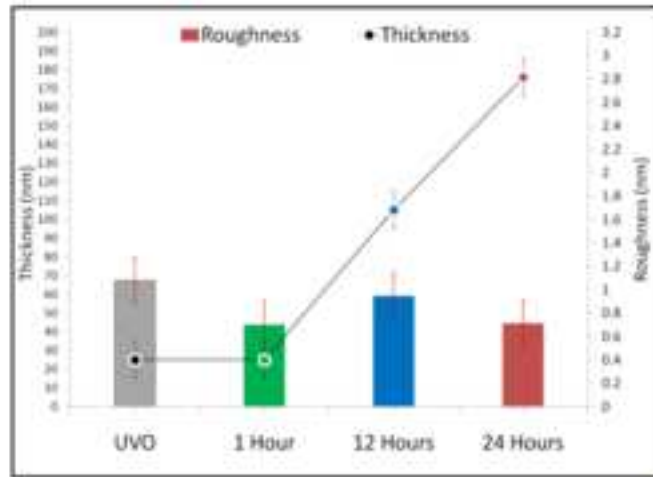

water

B

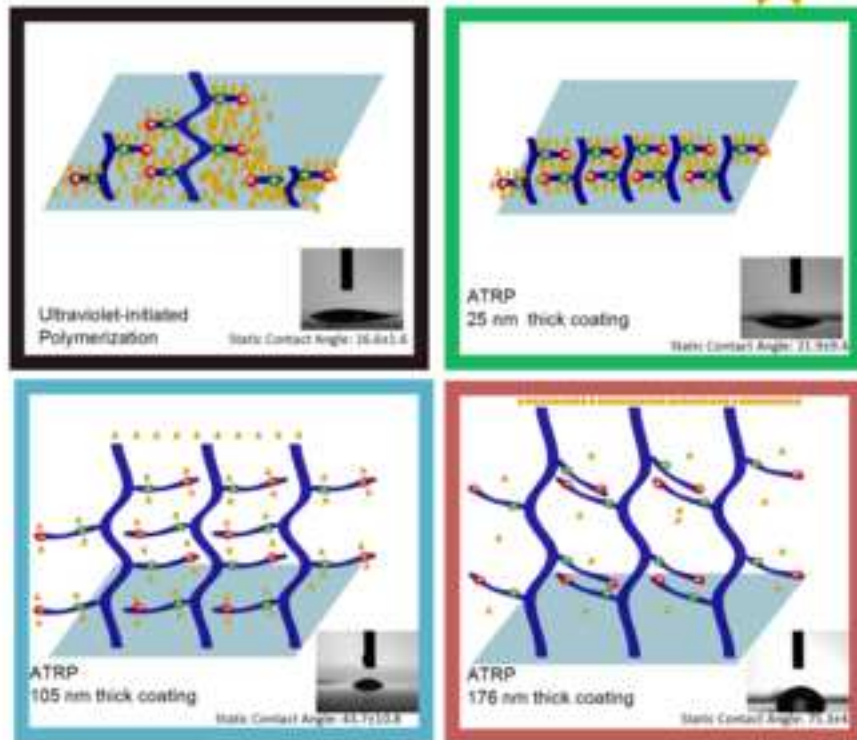

C

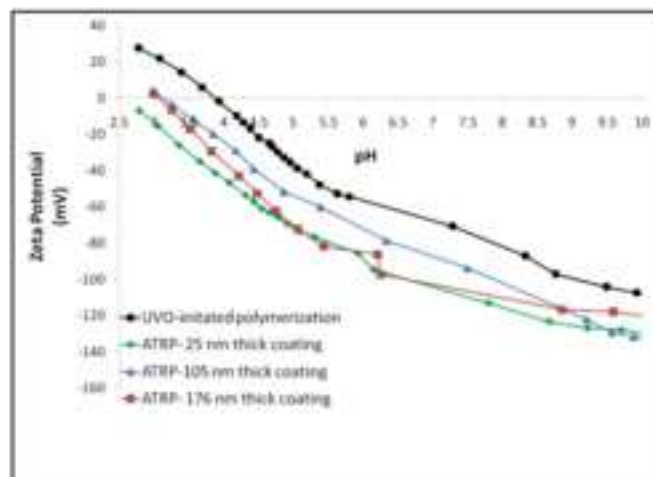

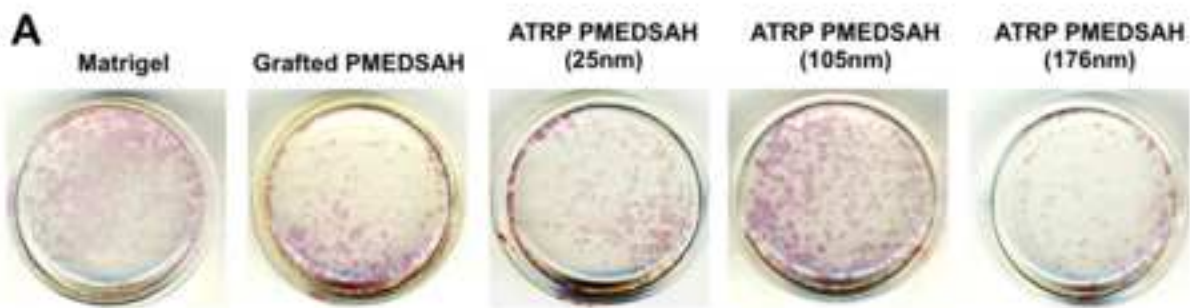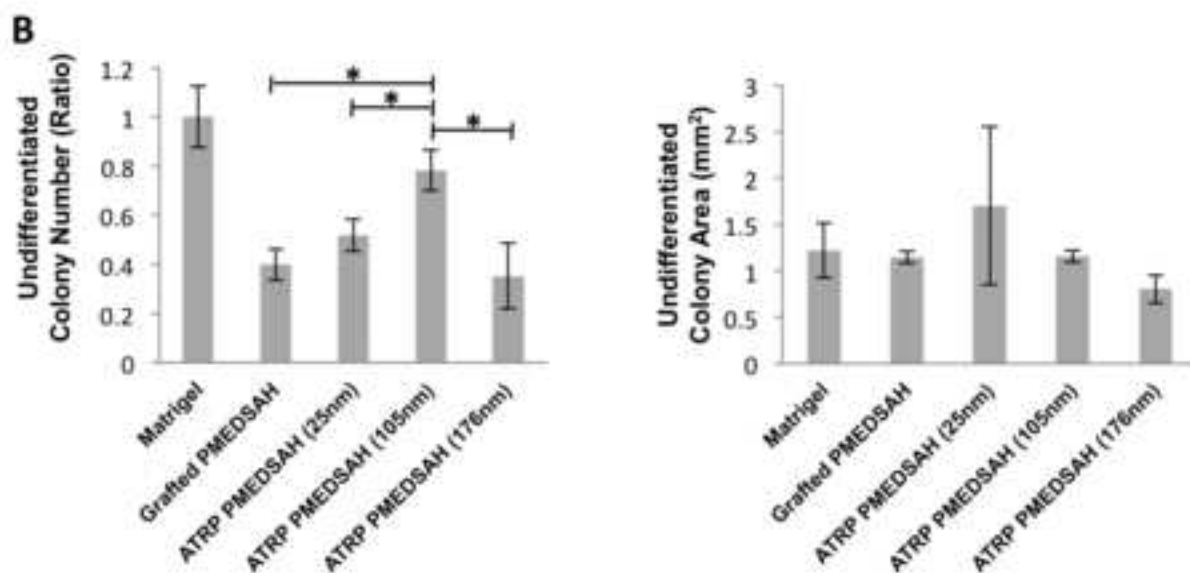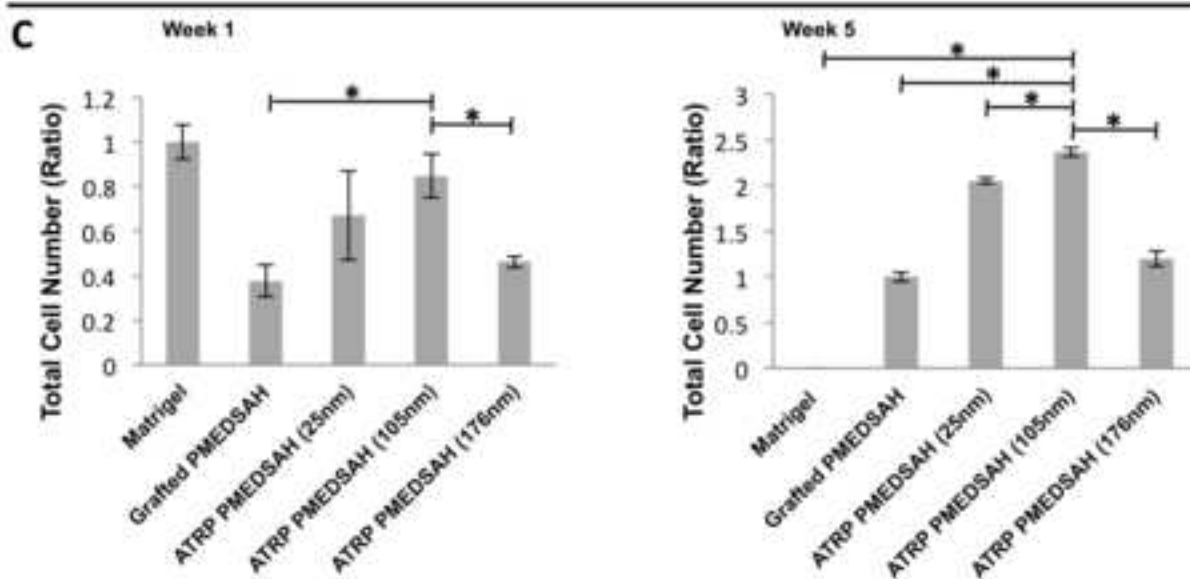

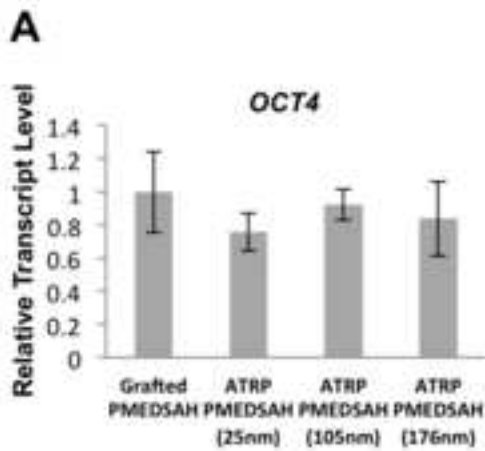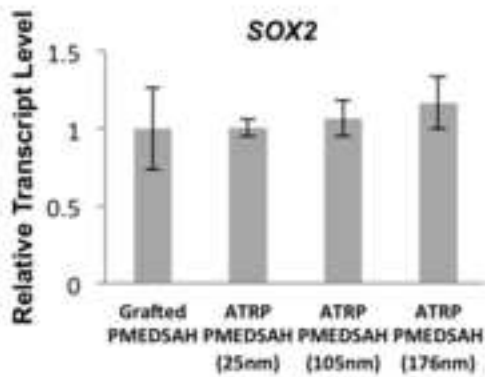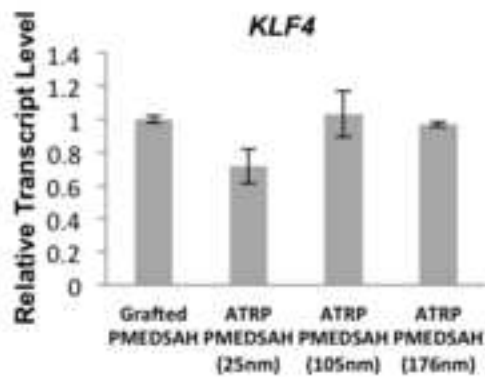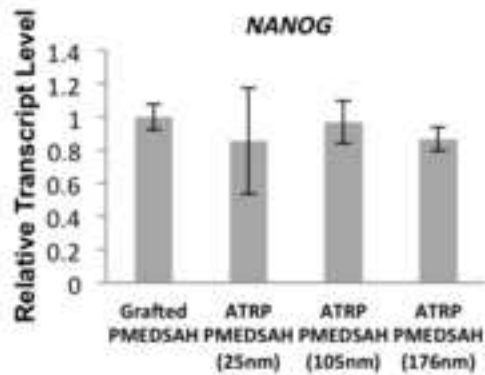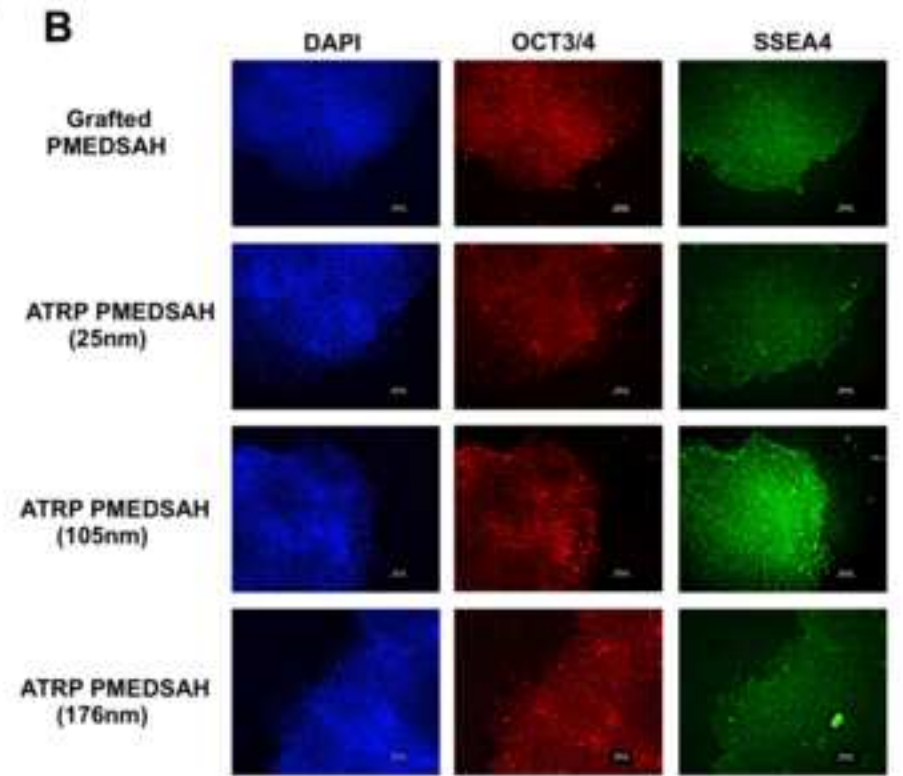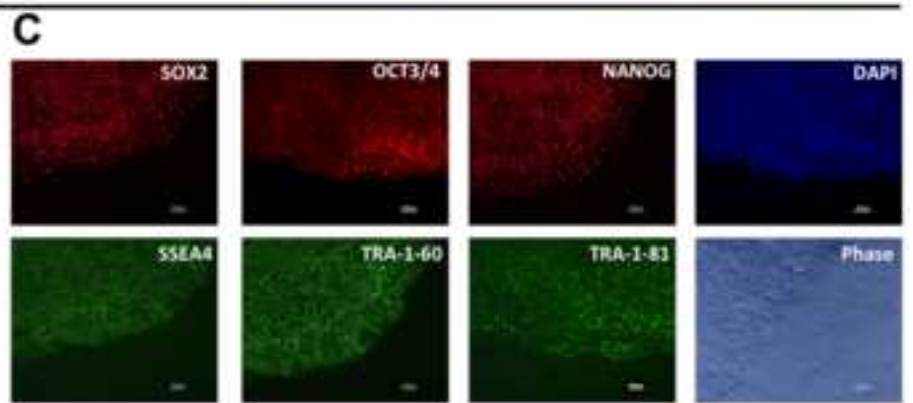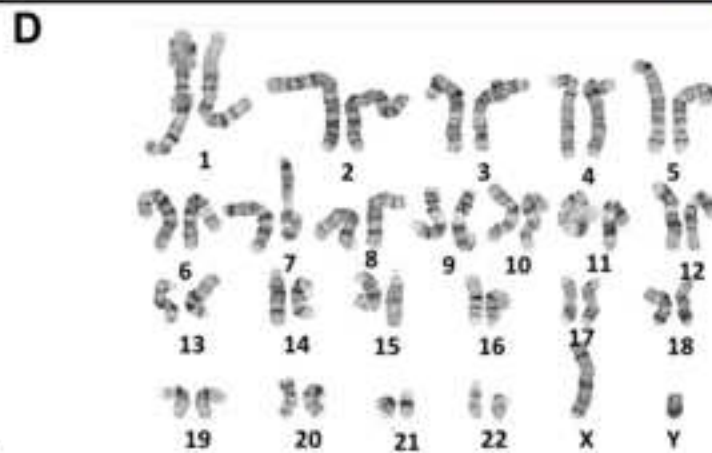

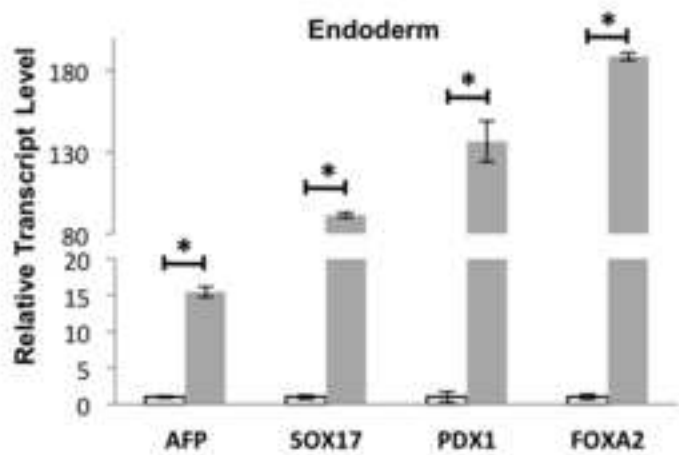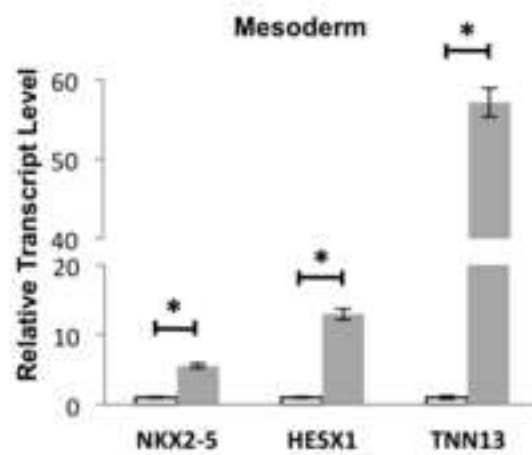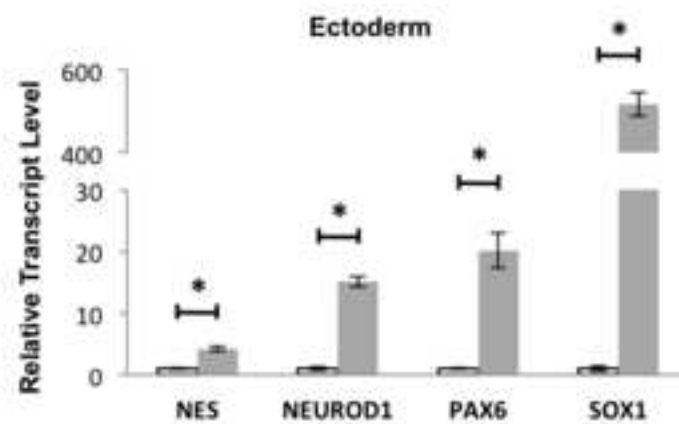

 hESCs  
 Lineage Differentiation



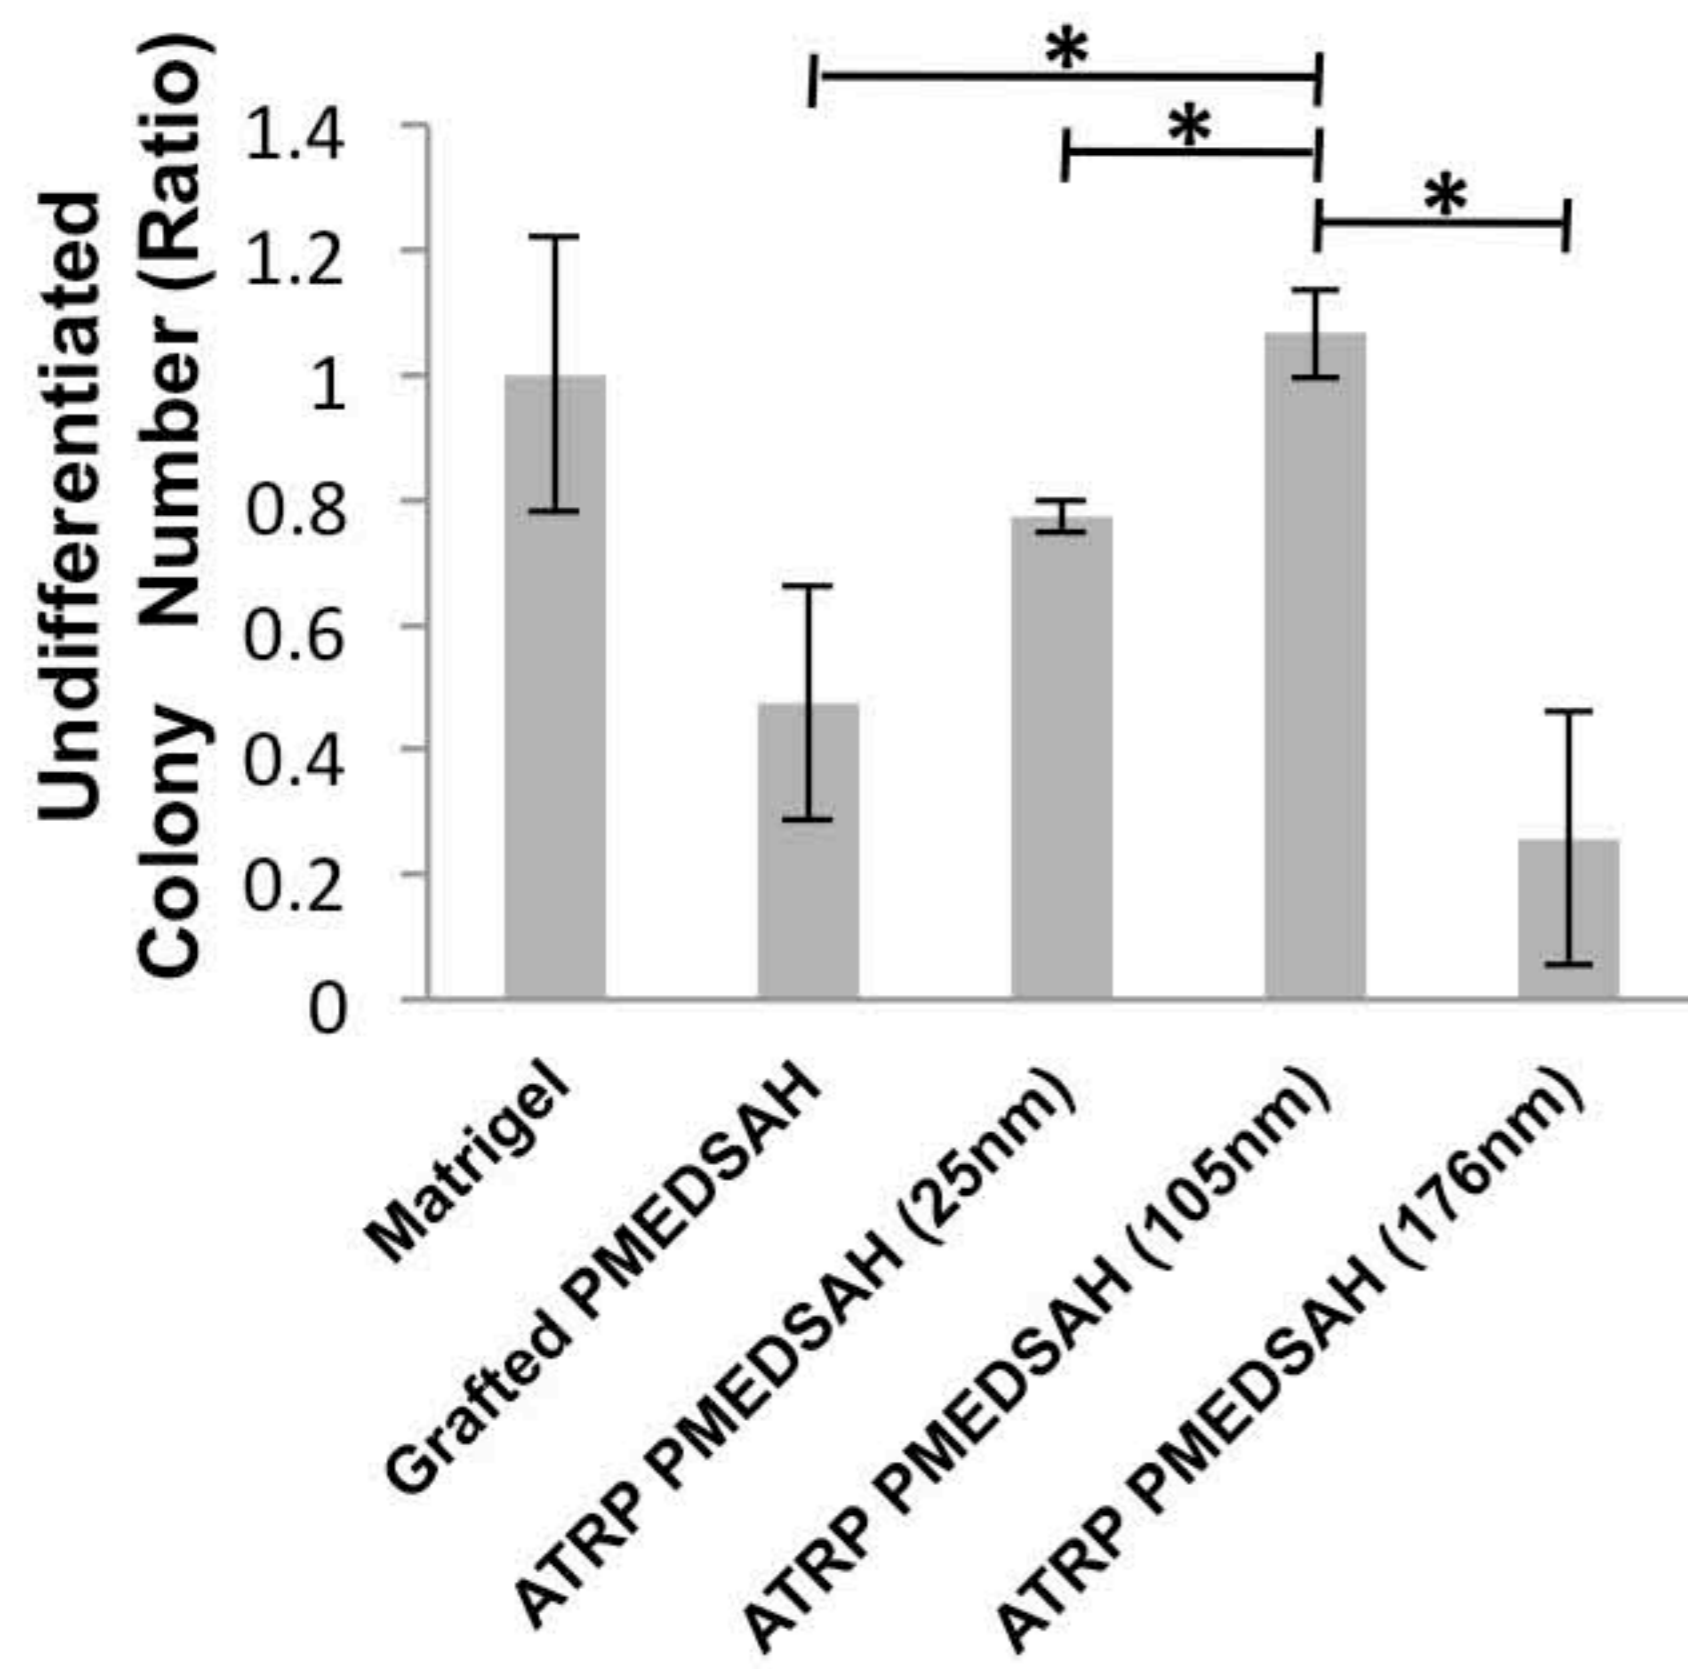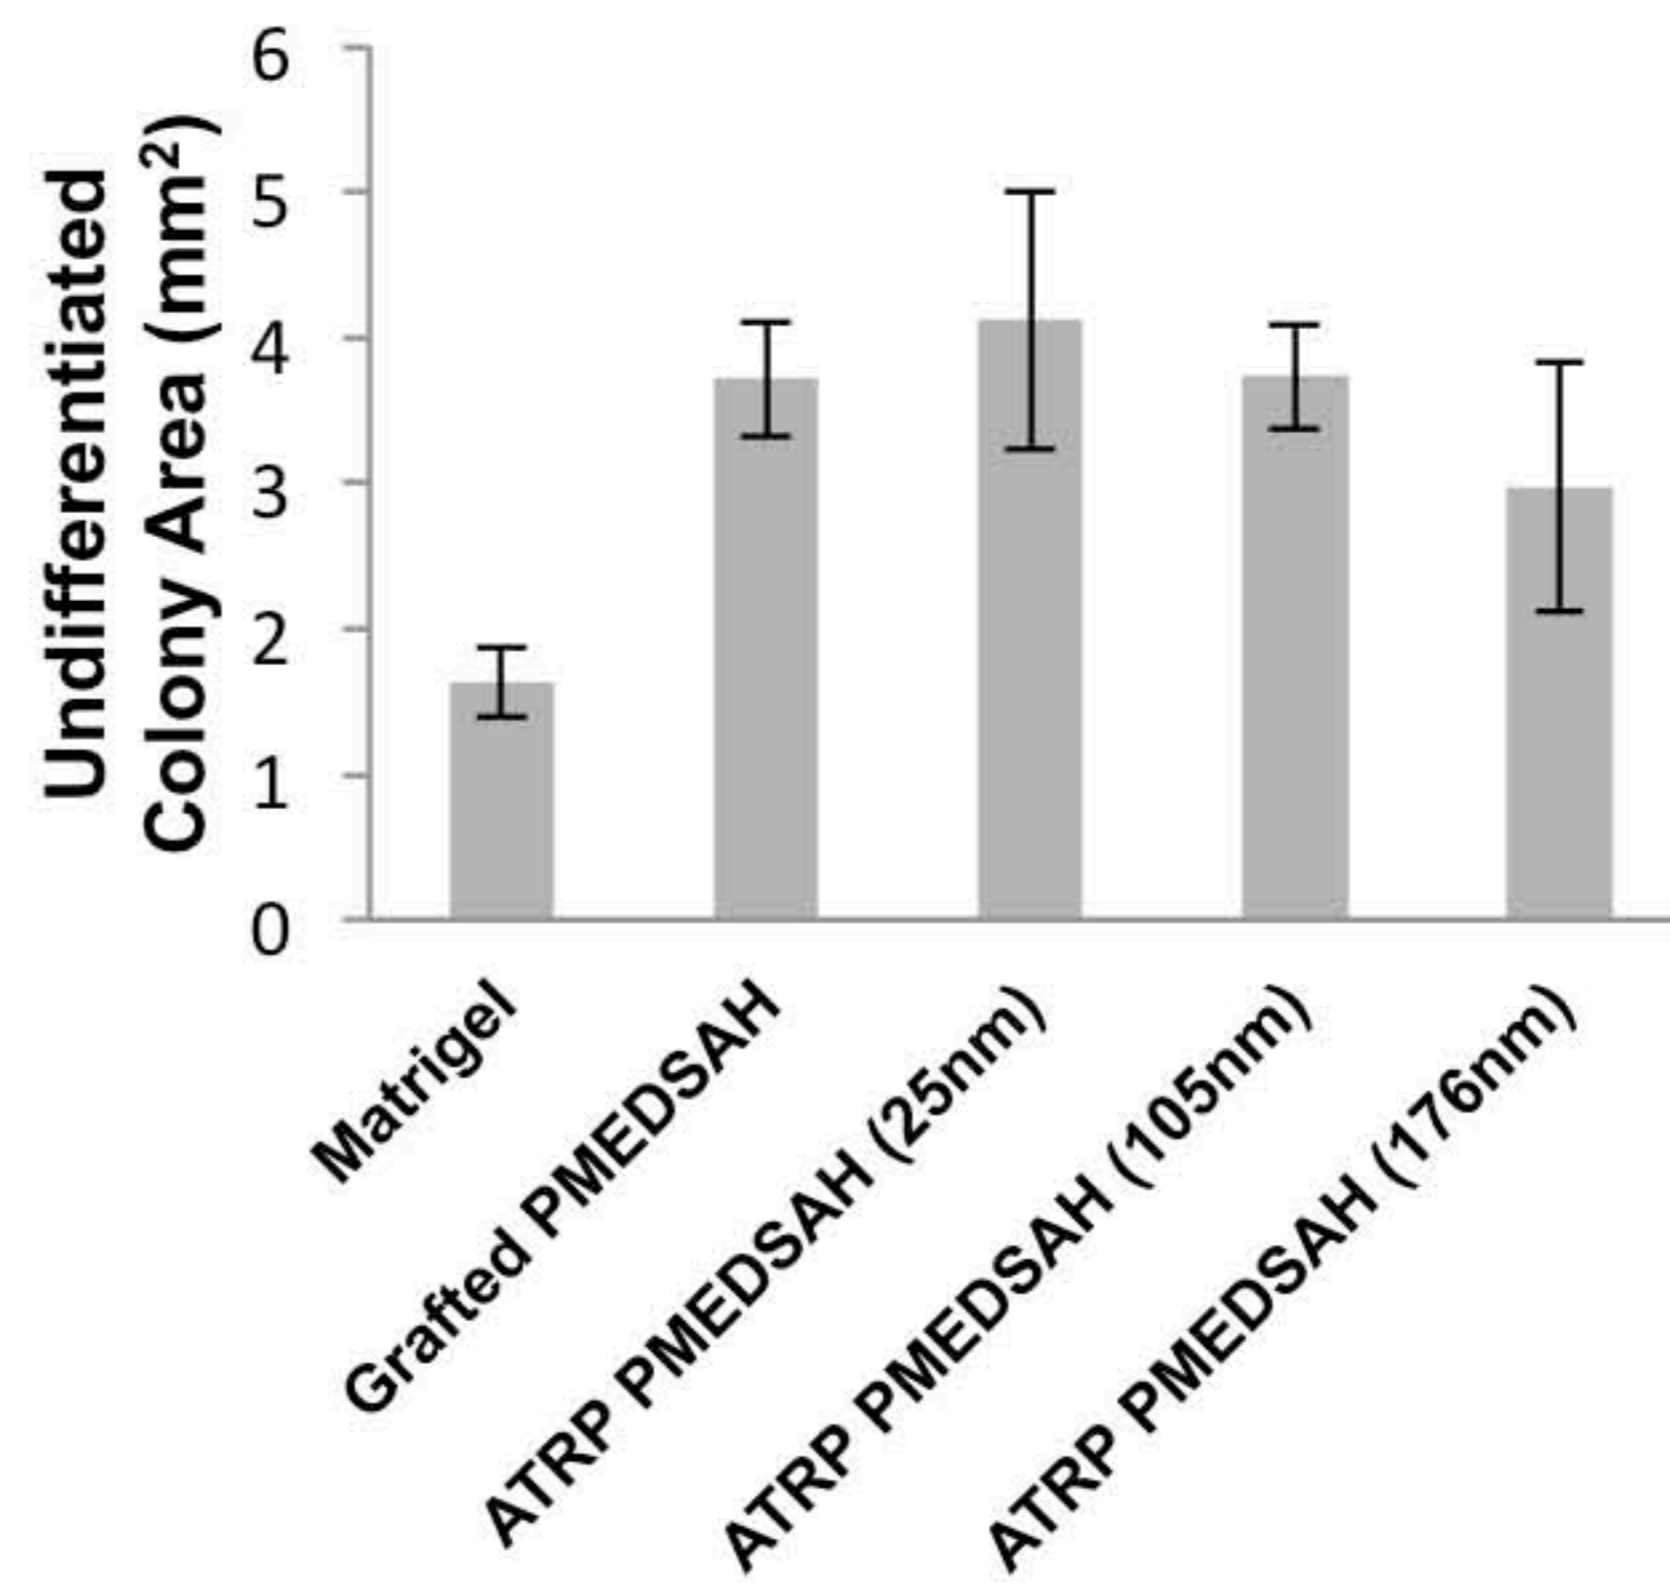

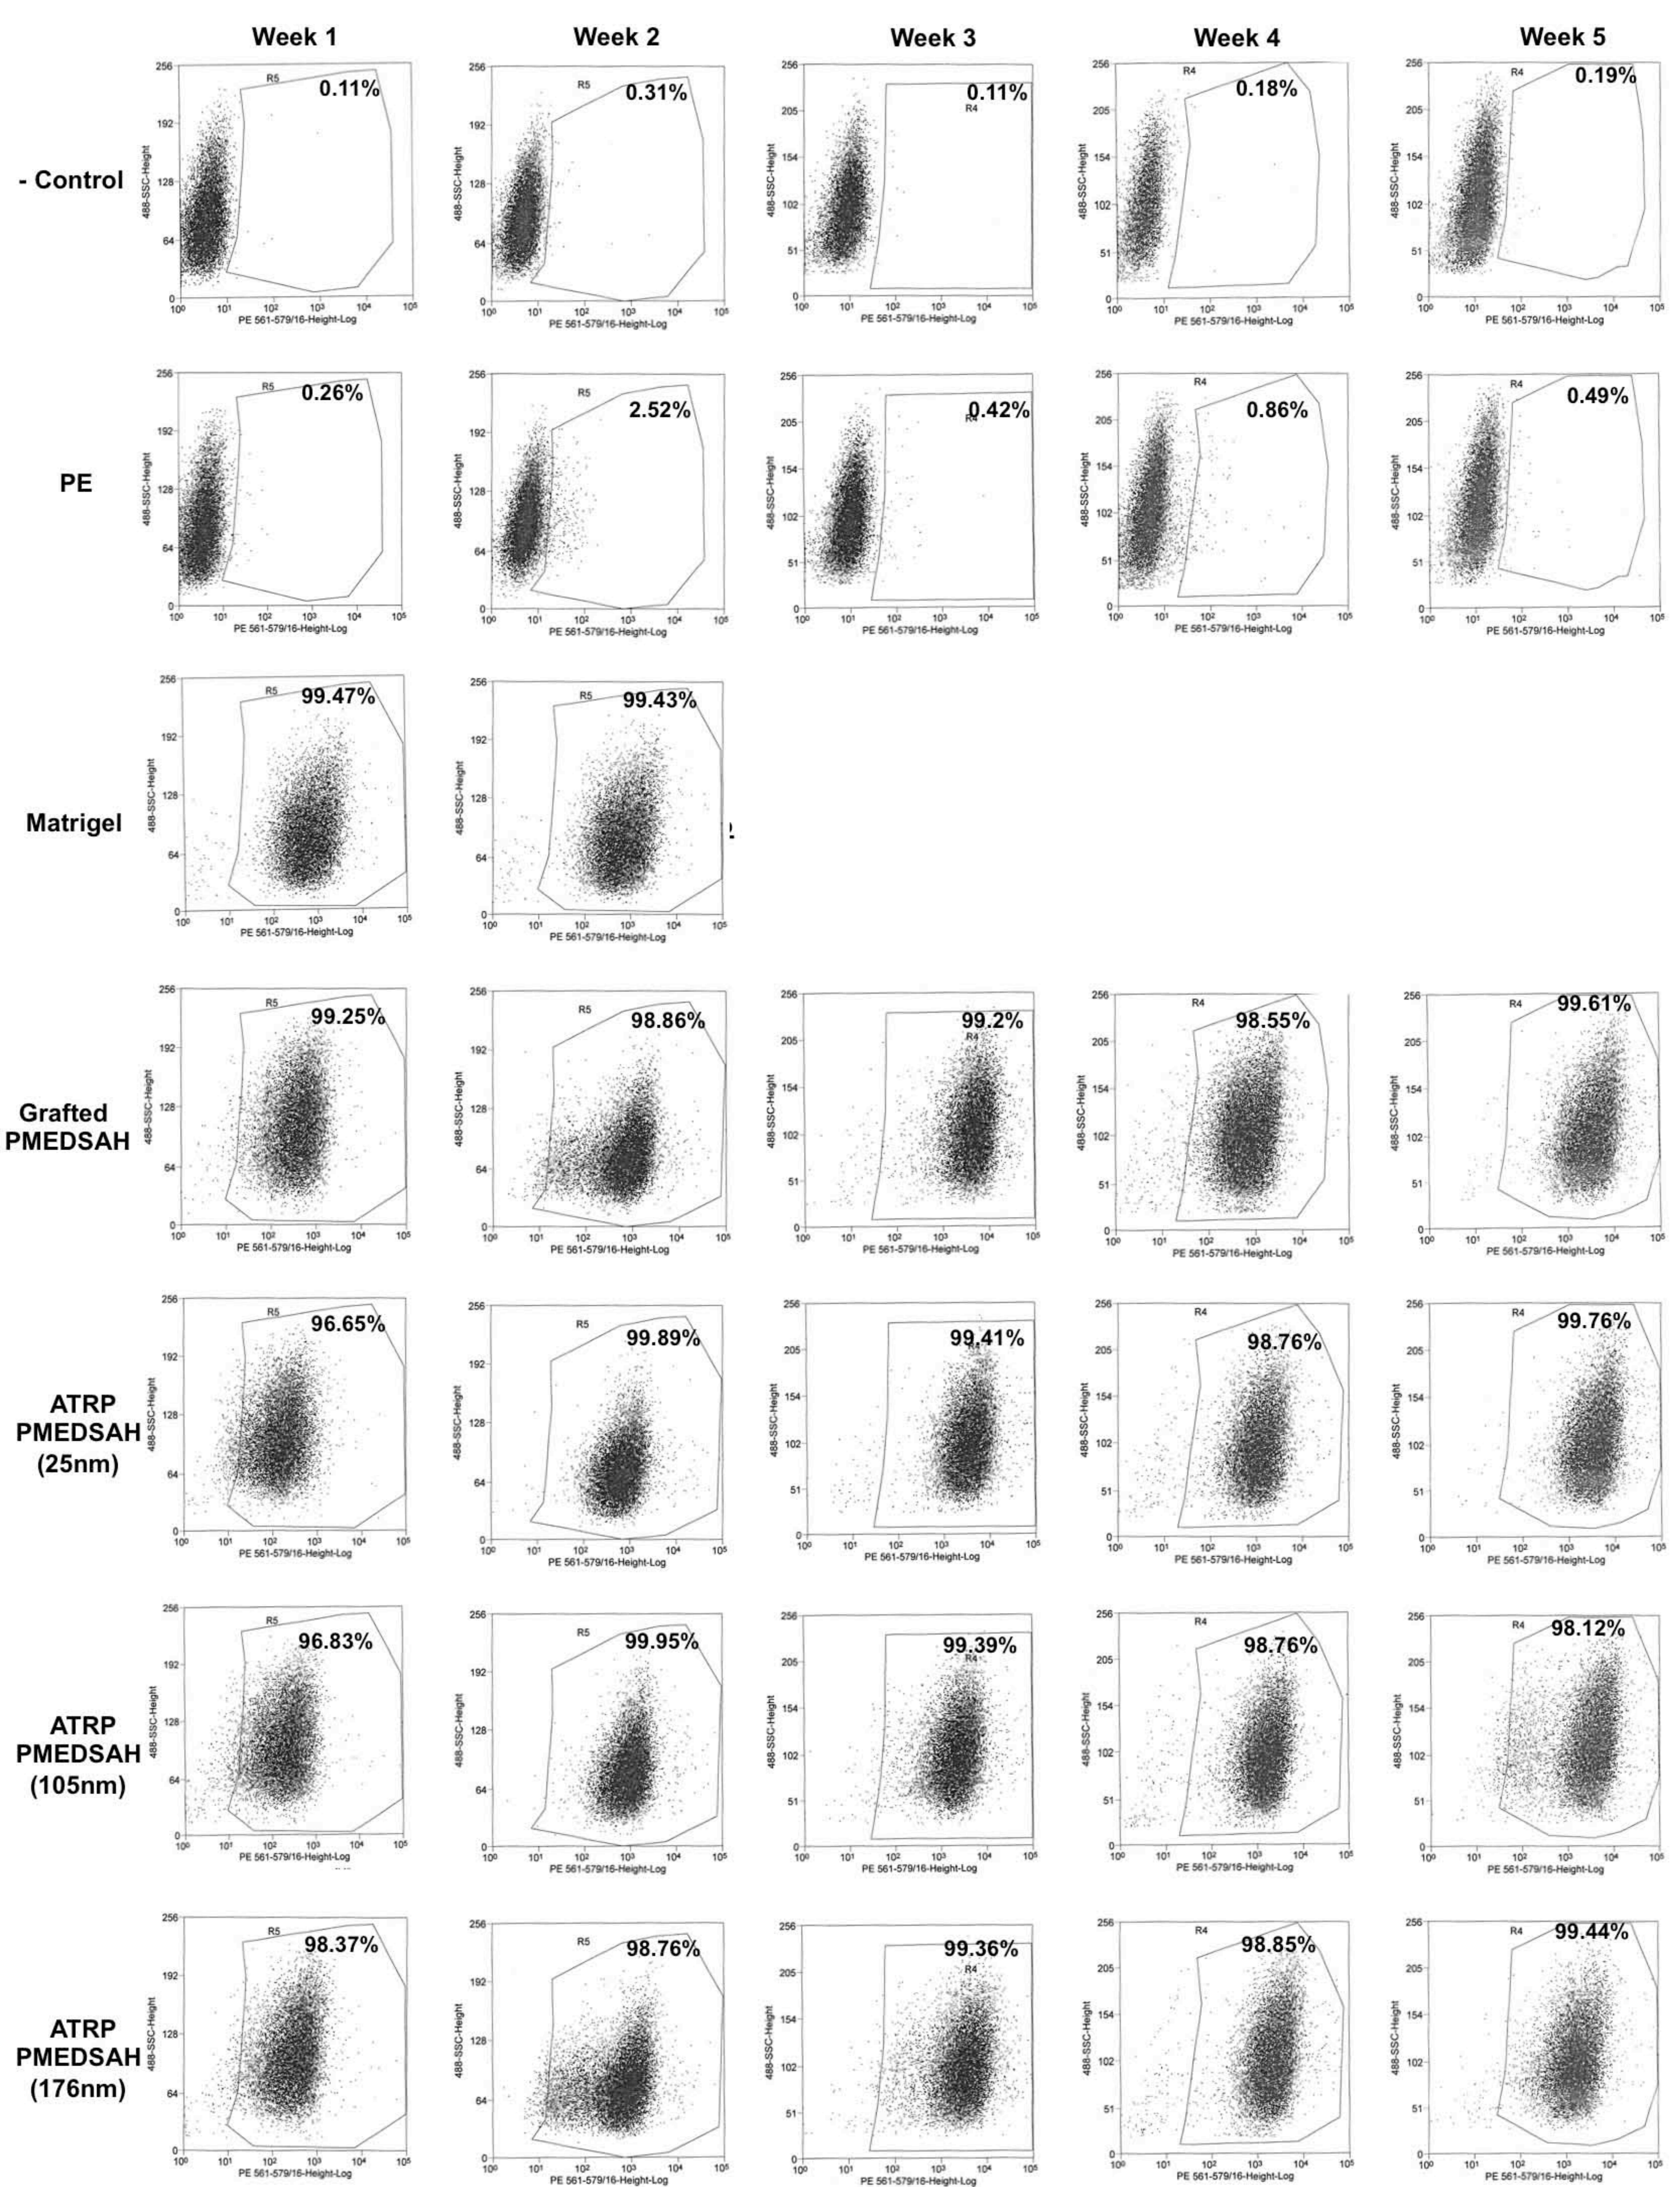

Supplement: NIHMS624723-supplement-supplement_1.pdf [file NIHMS624723-supplement-supplement_1.pdf]
